# Supplementary material
Source: PubMed Central journal article supplement (PMC8938308)
Supplement: NIHMS1786460-supplement-1.pdf [file NIHMS1786460-supplement-1.pdf]

Supplementary data of  
 “Prioritizing *de novo* autism risk variants with calibrated gene-  
 and variant-scoring models”

Yuxiang Jiang, Jorge Urresti, Kymberleigh A. Pagel, Akula Bala Pramod,  
 Lilia M. Iakoucheva, and Predrag Radivojac

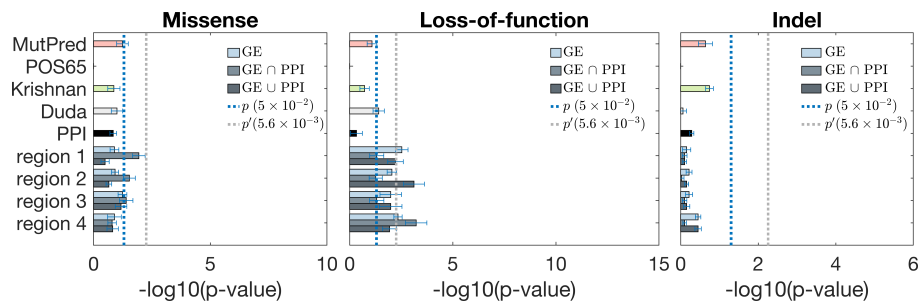

Figure 1: Same as Figure 3 in the main manuscript, but we exclude variants from genes in the list of POS65 from the  $p$ -value calculation.

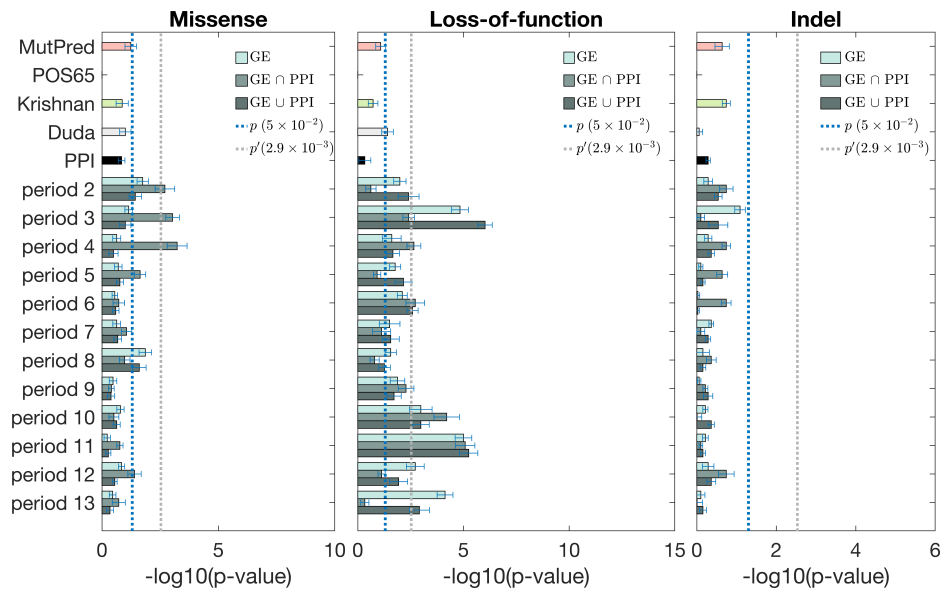

Figure 2: Same as Figure 4 in the main manuscript, but we exclude variants from genes in the list of POS65 from the  $p$ -value calculation.

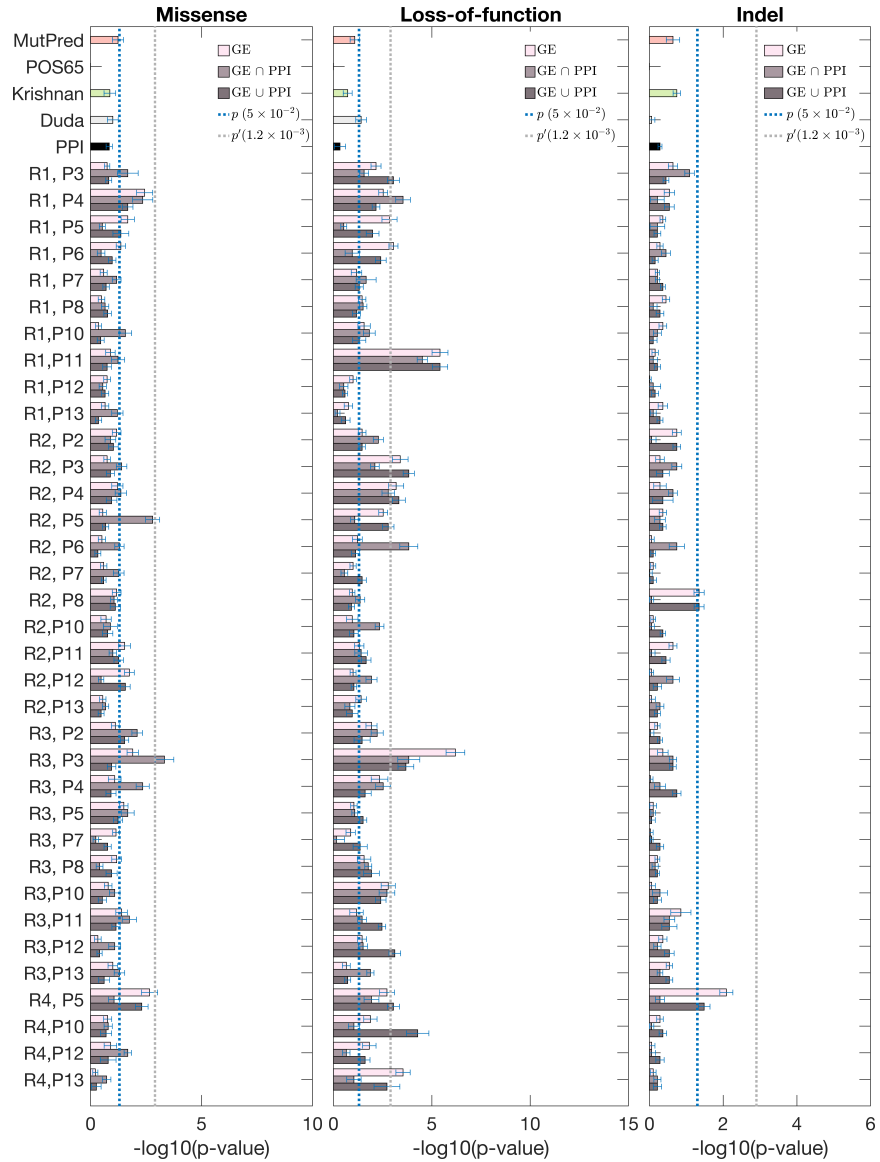

Figure 3: Same as Figure 5 in the main manuscript, but we exclude variants from genes in the list of POS65 from the  $p$ -value calculation.

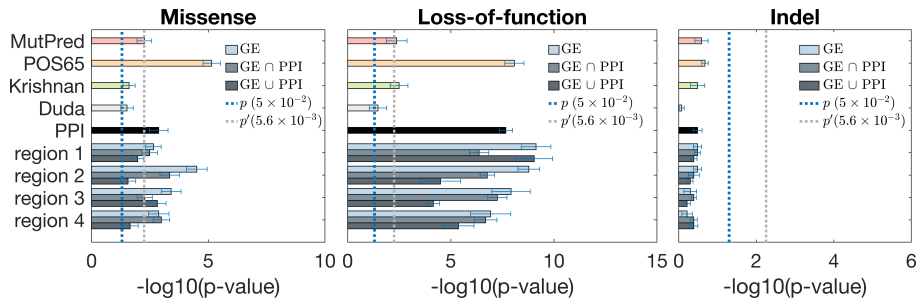

Figure 4: Same as Figure 3 in the main manuscript, but using 95% of control variants scores to determine the “right-tail” for the  $F$ -test.

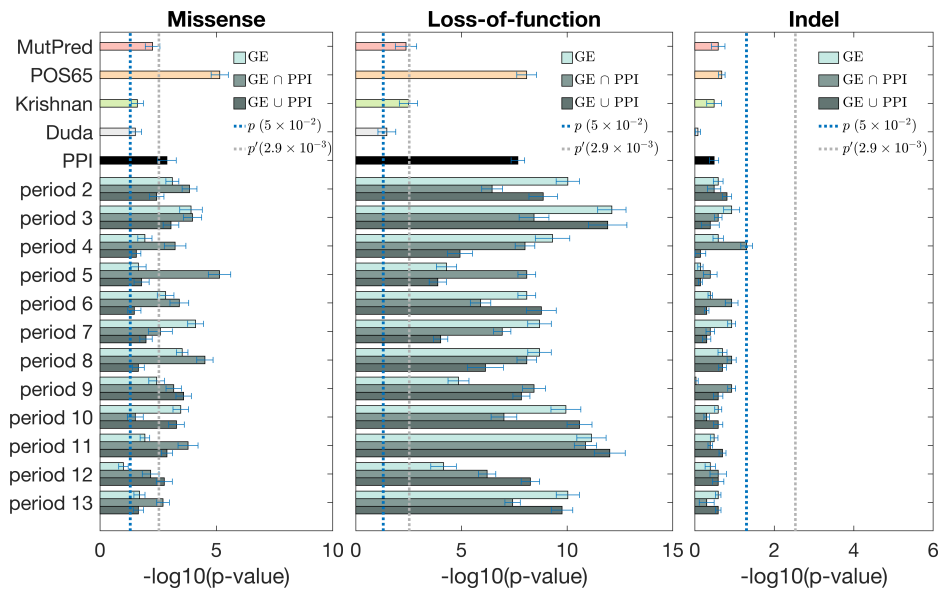

Figure 5: Same as Figure 4 in the main manuscript, but using 95% of control variants scores to determine the “right-tail” for the  $F$ -test.

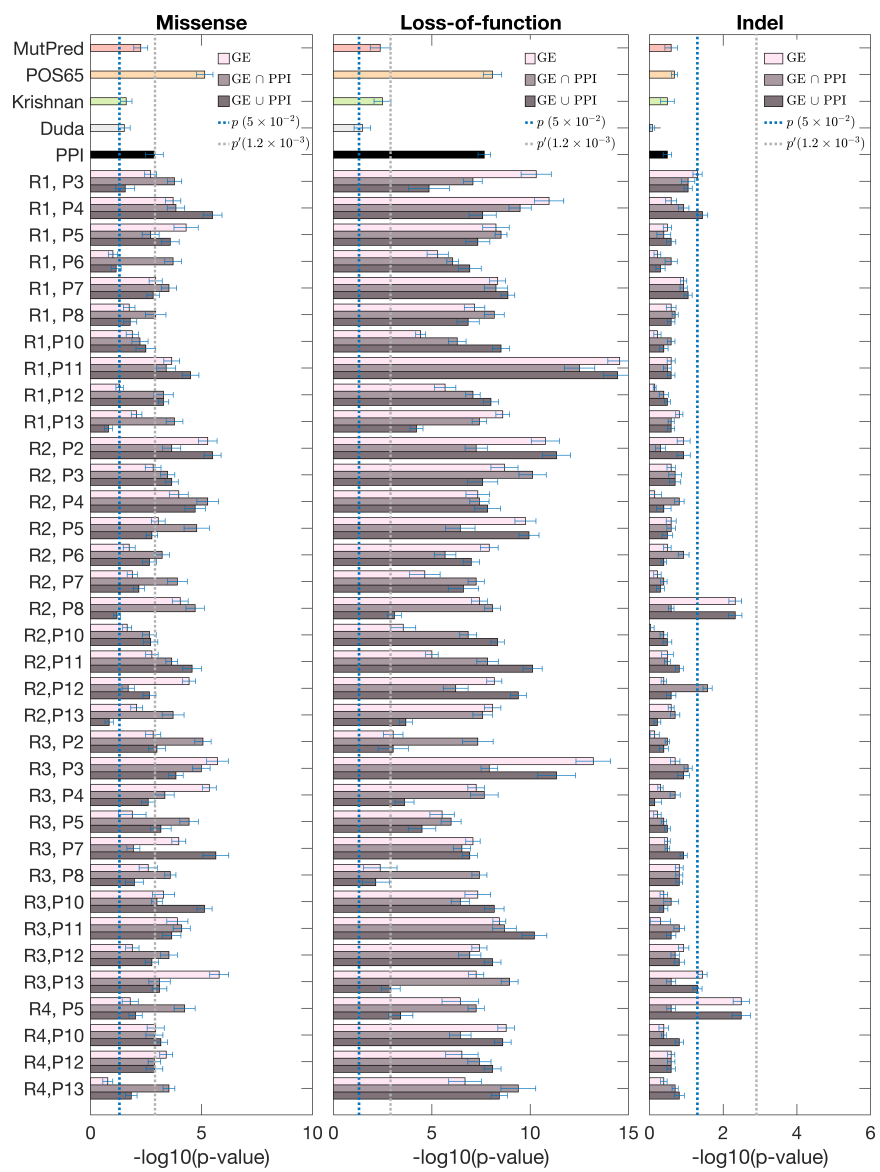

Figure 6: Same as Figure 5 in the main manuscript, but using 95% of control variants scores to determine the “right-tail” for the  $F$ -test.
